# Supplementary material for: Genetic evidence for serum amyloid P component as a drug target for treatment of neurodegenerative disorders
Source: PubMed Central journal article supplement — medRxiv. 2023 Aug 16:2023.08.15.23293564. Preprint. [Version 1] doi: 10.1101/2023.08.15.23293564 (PMC10462209; doi:10.1101/2023.08.15.23293564), 2023-08-16
Supplement: media-1.pdf [file media-1.pdf]

# Genetic evidence for serum amyloid P component as a drug target for treatment of neurodegenerative disorders

Supplementary information

Schmidt *et al.*

## Contents

### Figures

|    |                                                                                                    |   |
|----|----------------------------------------------------------------------------------------------------|---|
| S1 | Correlation between SomaLogic values and immunoassay for actual plasma SAP concentration . . . . . | 2 |
| S2 | Locus view plots . . . . .                                                                         | 6 |
| S3 | GWAS Catalog look-ups . . . . .                                                                    | 9 |

### Tables

|     |                                                                                                                                                                             |    |
|-----|-----------------------------------------------------------------------------------------------------------------------------------------------------------------------------|----|
| S1  | Lead variants for serum amyloid P component (SAP) plasma concentration . . . . .                                                                                            | 11 |
| S2  | SAP lead variant associations with plasma C-reactive protein (CRP) concentration . . .                                                                                      | 12 |
| S3  | Open target v2g results mapping <i>trans</i> -variant rs2808467 to a putative causal gene .                                                                                 | 13 |
| S4  | Open target v2g results mapping <i>trans</i> -variant rs165316 to a putative causal gene . .                                                                                | 14 |
| S5  | Open target v2g results mapping <i>trans</i> -variant rs10188292 to a putative causal gene .                                                                                | 15 |
| S6  | Open target v2g results mapping <i>trans</i> -variant rs4665972 to a putative causal gene .                                                                                 | 16 |
| S7  | Open target v2g results mapping <i>trans</i> -variant rs112875651 to a putative causal gene                                                                                 | 17 |
| S8  | Open target v2g results mapping <i>trans</i> -variant rs9591359 to a putative causal gene .                                                                                 | 18 |
| S9  | GWAS Catalog look-ups for putative causal genes for plasma SAP value. . . . .                                                                                               | 19 |
| S10 | The <i>cis</i> -Mendelian randomization results for the effects of one standard deviation higher plasma SAP value or plasma CRP concentration on dementia outcomes. . . . . | 20 |
| S11 | The <i>cis</i> -Mendelian randomization results for the effects of one standard deviation higher plasma SAP value on secondary outcomes . . . . .                           | 21 |
| S12 | The <i>cis</i> -Mendelian randomization results for the effects of one standard deviation higher plasma CRP concentration on secondary outcomes . . . . .                   | 23 |
| S13 | The <i>cis</i> -multivariable Mendelian randomization results for the effects of one standard deviation higher plasma SAP value or plasma CRP concentration. . . . .        | 24 |

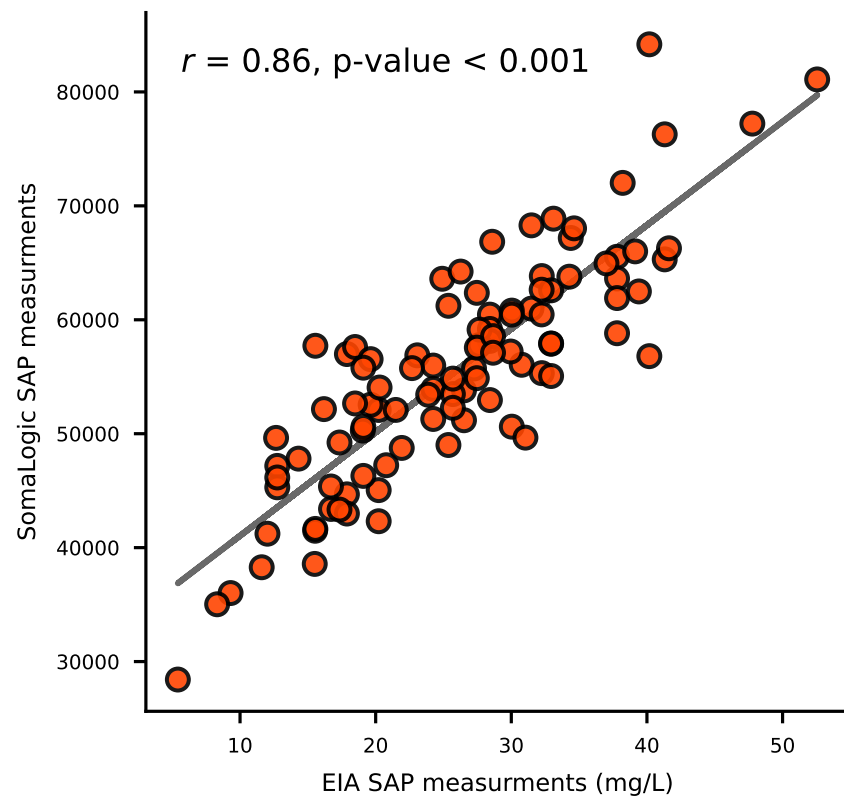

**Figure S1:** The Pearson correlation estimated in 100 plasma samples from the EPIC-Norfolk study, between SomaLogic relative intensity scores for plasma SAP value and electroimmunoassay (EIA) of actual SAP concentration, standardised and calibrated with authentic, pure, comprehensively characterized, native, human SAP.

## Figure S2:

3

Locus view plots showing the plasma SAP and CRP signals of the ten independent lead variants identified in the present SAP GWAS meta-analysis of three independent pQTL GWAS based on SomaLogic assays. The variant-specific  $-\log_{10}(\text{p-value})$  is plotted (y-axis) against the genomic location (x-axis). The lead variant is indicated by a purple diamond, with linkage disequilibrium (LD) relative to the lead variant indicated by the colours of the dots. The R-squared, representing LD, was from a random sample of 5,000 UK Biobank participants supplemented by the 592 participants of the 1,000 Genomes EUR reference panel.

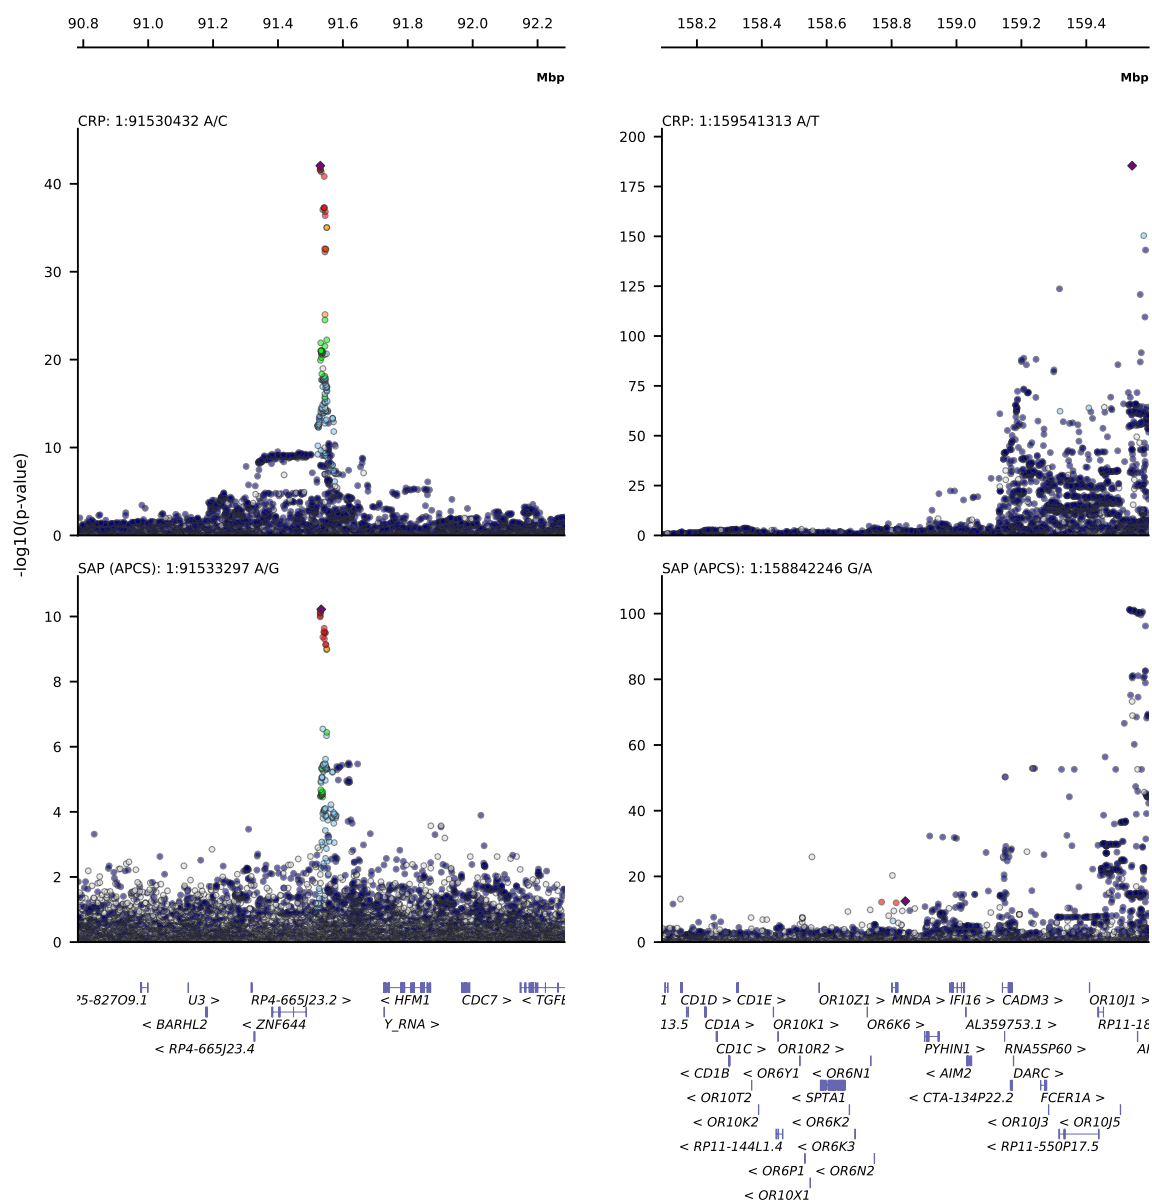
 $r^2$ 
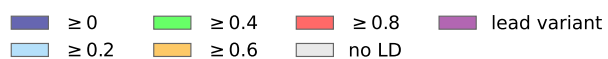

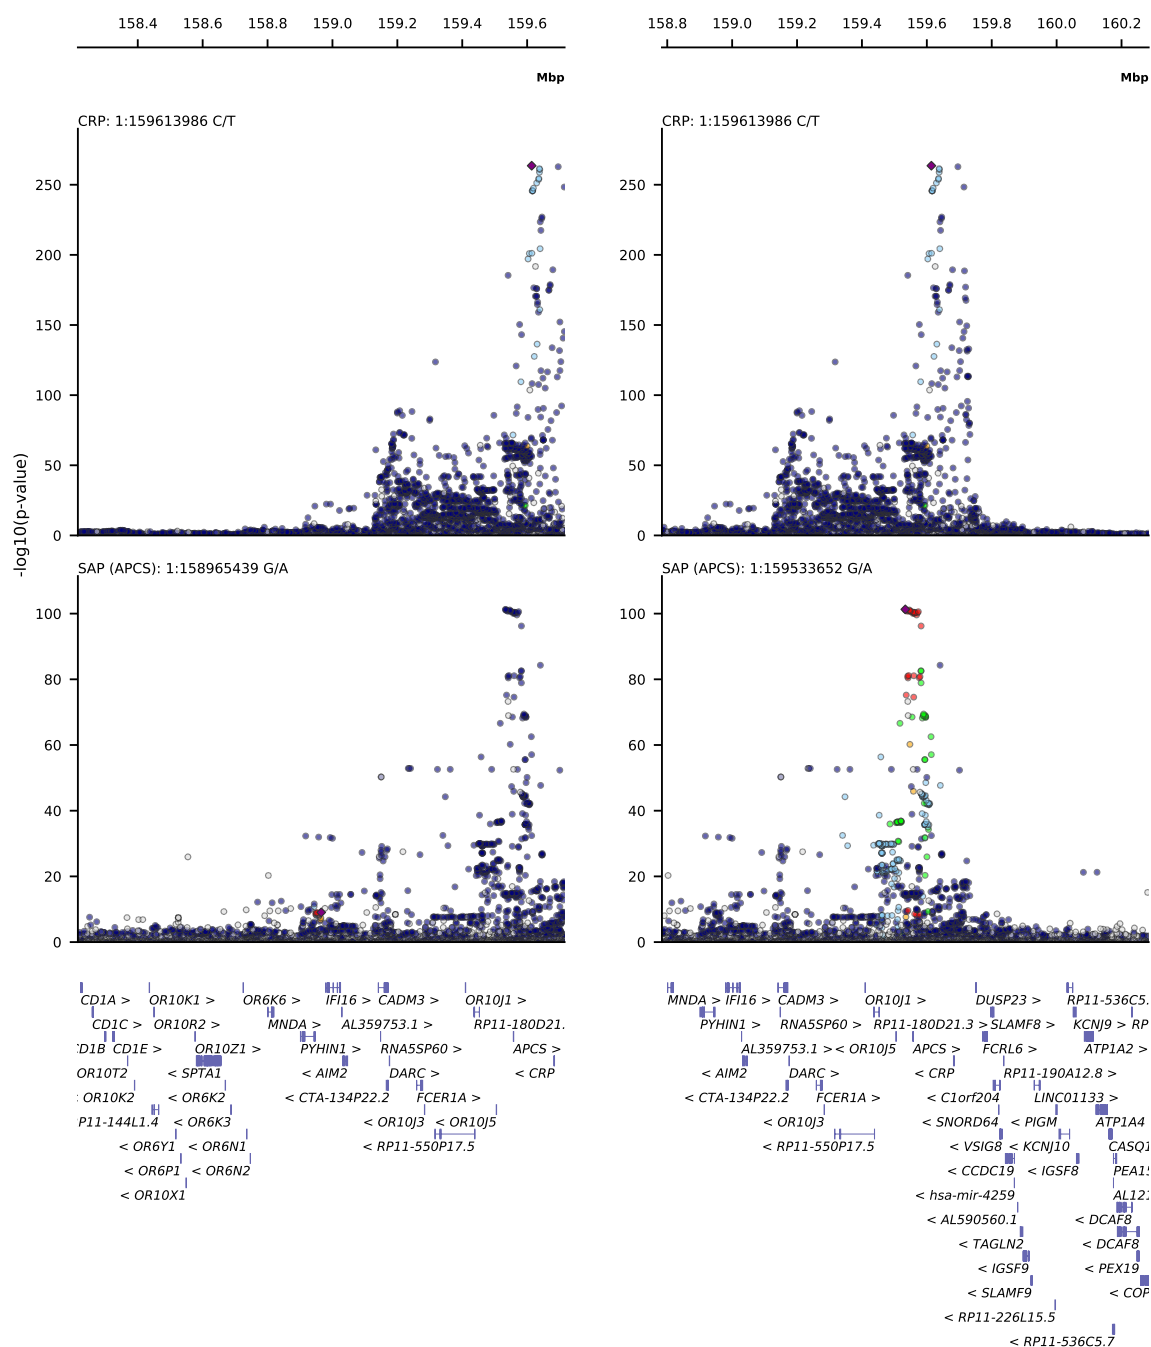
 $r^2$ 
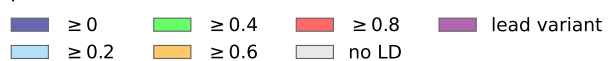



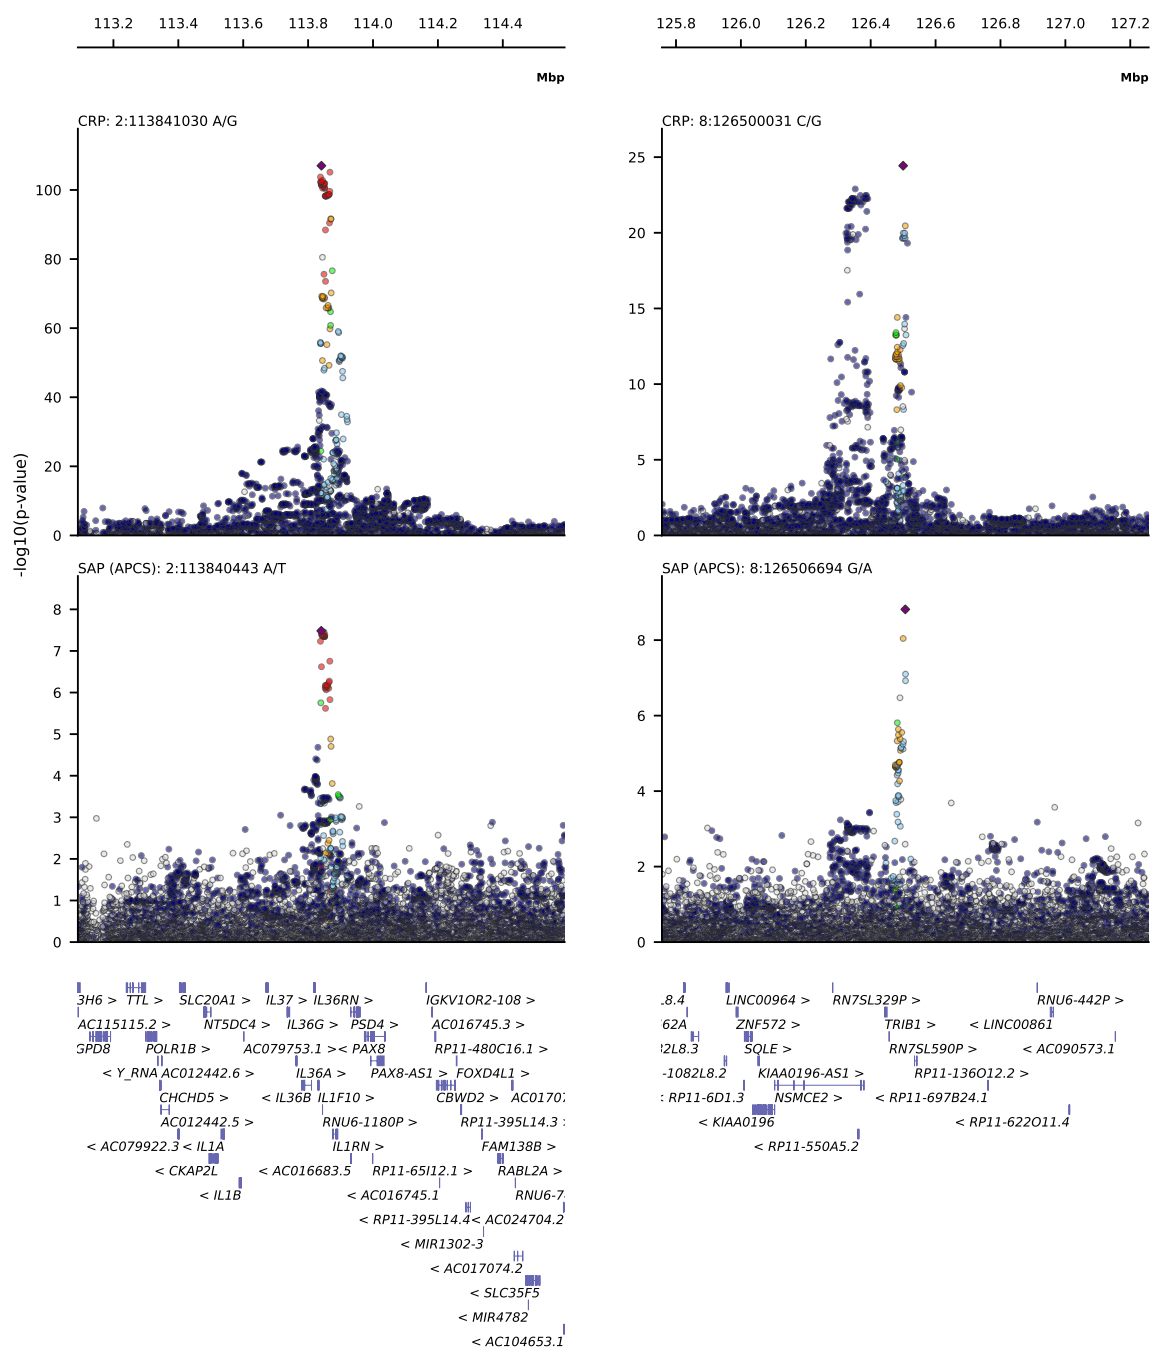
 $r^2$ 


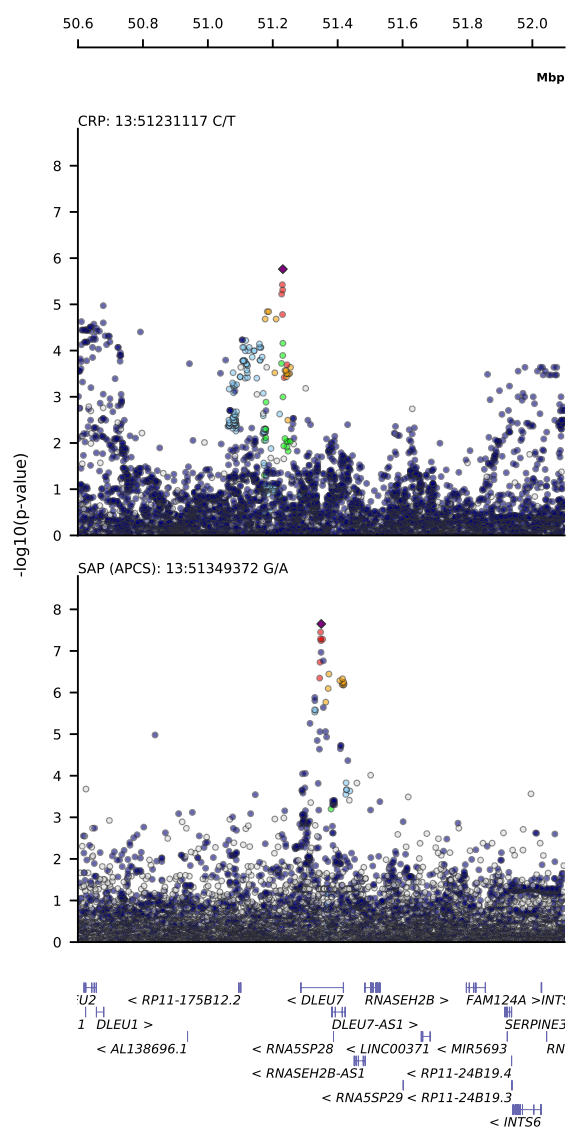
 $r^2$ 
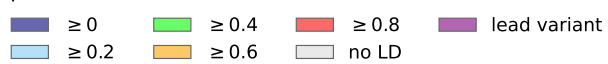

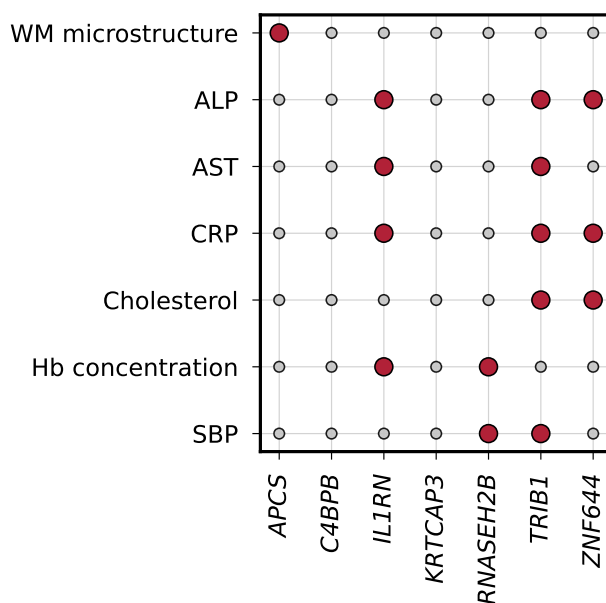

**Figure S3:** GWAS findings for the 'author assigned genes' reported by GWAS Catalog, showing all traits assigned to *APCS* and traits reported for 2 or more of the trans signals. Abbreviations: WM, white matter; Hb, blood haemoglobin concentration; SBP, systolic blood pressure; plasma concentrations of ALP, alkaline phosphatase; AST, aspartate transaminase; CRP, C-reactive protein. Table S9 shows the complete GWAS Catalog look-up.



**Table S1:** Lead variants for plasma serum amyloid P component (SAP) value based on a meta-analysis GWAS in 44,288 subjects. Lead variants from a *trans*-region, defined as a signal beyond +/-2MB with respect to *APCS*, were mapped to putative causal genes using Open Target's 'v2g' pipeline. The provided genetic information is based on genomic build 37.

| lead variant (rsid) | chromosome | start position | effect allele | other allele | effect size | standard error | $-\log_{10}(\text{p-value})$ | Nearest protein coding gene | Ensembl id (Nearest protein coding gene) | v2g mapped gene | Ensembl id (v2g mapped gene) |
|---------------------|------------|----------------|---------------|--------------|-------------|----------------|------------------------------|-----------------------------|------------------------------------------|-----------------|------------------------------|
| rs140308485         | 1          | 158842246      | A             | G            | -0.1903     | 0.0261         | 12.468                       | MNDA                        | ENSG00000163563                          | APCS            | ENSG00000132703              |
| rs13374652          | 1          | 158965439      | A             | G            | -0.0892     | 0.0146         | 9.045                        | IFI16                       | ENSG00000163565                          | APCS            | ENSG00000132703              |
| rs1341664           | 1          | 159533652      | A             | G            | -0.2144     | 0.0100         | 101.296                      | APCS                        | ENSG00000132703                          | APCS            | ENSG00000132703              |
| rs78228389          | 1          | 159783225      | A             | G            | 0.1335      | 0.0227         | 8.382                        | FCRL6                       | ENSG00000181036                          | APCS            | ENSG00000132703              |
| rs2808467           | 1          | 207273801      | G             | T            | -0.0938     | 0.0100         | 20.363                       | C4BPB                       | ENSG00000123843                          | C4BPB           | ENSG00000123843              |
| rs165316            | 1          | 91533297       | A             | G            | 0.0564      | 0.0086         | 10.219                       | ZNF644                      | ENSG00000122482                          | ZNF644          | ENSG00000122482              |
| rs10188292          | 2          | 113840443      | A             | T            | -0.0395     | 0.0071         | 7.484                        | IL1F10                      | ENSG00000136697                          | IL1RN           | ENSG00000136689              |
| rs4665972           | 2          | 27598097       | C             | T            | -0.0807     | 0.0088         | 19.132                       | SNX17                       | ENSG00000115234                          | KRTCAP3         | ENSG00000157992              |
| rs112875651         | 8          | 126506694      | A             | G            | -0.0443     | 0.0073         | 8.815                        | TRIB1                       | ENSG00000173334                          | TRIB1           | ENSG00000173334              |
| rs9591359           | 13         | 51349372       | A             | G            | -0.0517     | 0.0092         | 7.650                        | DLEU1                       | ENSG00000176124                          | RNASEH2B        | ENSG00000136104              |

**Table S2:** SAP lead variant associations with plasma concentration of C-reactive protein (ref: 62)

| lead variant (rsid) | chromosome | start position | effect allele | other allele | effect size | standard error | $-\log_{10}(\text{p-value})$ |
|---------------------|------------|----------------|---------------|--------------|-------------|----------------|------------------------------|
| rs140308485         | 1          | 158842246      | A             | G            | -0.0150     | 0.0081         | 1.1836                       |
| rs13374652          | 1          | 158965439      | A             | G            | 0.0005      | 0.0043         | 0.0424                       |
| rs1341664           | 1          | 159533652      | A             | G            | -0.0153     | 0.0031         | 6.2623                       |
| rs78228389          | 1          | 159783225      | A             | G            | -0.0242     | 0.0058         | 4.5163                       |
| rs2808467           | 1          | 207273801      | G             | T            | -0.0028     | 0.0027         | 0.5109                       |
| rs165316            | 1          | 91533297       | A             | G            | 0.0346      | 0.0025         | 41.3587                      |
| rs10188292          | 2          | 113840443      | A             | T            | -0.0439     | 0.0020         | 102.3605                     |
| rs4665972           | 2          | 27598097       | C             | T            | -0.0741     | 0.0021         | 262.4584                     |
| rs112875651         | 8          | 126506694      | A             | G            | -0.0202     | 0.0021         | 20.4605                      |
| rs9591359           | 13         | 51349372       | A             | G            | -0.0017     | 0.0026         | 0.2834                       |

**Table S3:** Open target v2g results mapping *trans*-variant rs2808467 to a putative causal gene

| Gene            | Overall V2G | Distance (Canonical TSS) | pQTL | sQTL | eQTL | Enhancer-TSS corr (FANTOM5) | PCHI-C (Javierre, 2016) | DHS-promoter corr (Thurman, 2012) | PCHI-C (Jung, 2019) | VEP (Ensembl) |
|-----------------|-------------|--------------------------|------|------|------|-----------------------------|-------------------------|-----------------------------------|---------------------|---------------|
| <i>YOD1</i>     | 0.0598      | 47476                    | -    | -    | -    | -                           | -                       | -                                 | -                   | -             |
| <i>CD55</i>     | 0.1793      | 221063                   | -    | -    | 0.6  | -                           | 0.9                     | -                                 | -                   | -             |
| <i>PIGR</i>     | 0.0465      | 153990                   | -    | -    | -    | -                           | -                       | -                                 | -                   | -             |
| <i>IL20</i>     | 0.0332      | 234833                   | -    | -    | -    | -                           | -                       | -                                 | -                   | -             |
| <i>DYRK3</i>    | 0.0066      | 464920                   | -    | -    | -    | -                           | -                       | -                                 | -                   | -             |
| <i>MAPKAPK2</i> | 0.0133      | 415551                   | -    | -    | -    | -                           | -                       | -                                 | -                   | -             |
| <i>C4BPA</i>    | 0.1992      | 3777                     | -    | -    | 1    | -                           | -                       | -                                 | -                   | -             |
| <i>EIF2D</i>    | 0.0000      | 487991                   | -    | -    | -    | -                           | -                       | -                                 | -                   | -             |
| <i>IL24</i>     | 0.0398      | 203013                   | -    | -    | -    | -                           | -                       | -                                 | -                   | -             |
| <i>IL19</i>     | 0.0199      | 329692                   | -    | -    | -    | -                           | -                       | -                                 | -                   | -             |
| <i>FCMR</i>     | 0.0398      | 177209                   | -    | -    | -    | -                           | -                       | -                                 | -                   | -             |
| <i>C1orf116</i> | 0.0598      | 67700                    | -    | -    | -    | -                           | -                       | -                                 | -                   | -             |
| <i>C4BPB</i>    | 0.2676      | 11596                    | -    | 1    | -    | -                           | -                       | -                                 | -                   | -             |
| <i>CD46</i>     | 0.0000      | -                        | -    | 0    | -    | -                           | -                       | -                                 | -                   | -             |
| <i>IL10</i>     | 0.0199      | 325915                   | -    | -    | -    | -                           | -                       | -                                 | -                   | -             |
| <i>CR1</i>      | 0.0598      | 395691                   | -    | -    | -    | -                           | 0.7                     | -                                 | -                   | -             |
| <i>PFKFB2</i>   | 0.0598      | 66090                    | -    | -    | -    | -                           | -                       | -                                 | -                   | -             |
| <i>FCAMR</i>    | 0.0465      | 129831                   | -    | -    | -    | -                           | -                       | -                                 | -                   | -             |
| <i>CR2</i>      | 0.0531      | 352568                   | -    | -    | -    | -                           | 0.5                     | -                                 | -                   | -             |

General:

Entries without information are marked by '- '.

**Table S4:** Open target v2g results mapping *trans*-variant rs165316 to a putative causal gene

| Gene          | Overall V2G | Distance (Canonical TSS) | pQTL | sQTL | eQTL | Enhancer-TSS corr (FANTOM5) | PCHI-C (Javierre, 2016) | DHS-promoter corr (Thurman, 2012) | PCHI-C (Jung, 2019) | VEP (Ensembl) |
|---------------|-------------|--------------------------|------|------|------|-----------------------------|-------------------------|-----------------------------------|---------------------|---------------|
| <i>ZNF644</i> | 0.0598      | 45468                    | -    | -    | -    | -                           | -                       | -                                 | -                   | -             |
| <i>BARHL2</i> | 0.0199      | 350438                   | -    | -    | -    | -                           | -                       | -                                 | -                   | -             |
| <i>CDC7</i>   | 0.0066      | 433111                   | -    | -    | -    | -                           | -                       | -                                 | -                   | -             |
| <i>HFM1</i>   | 0.0199      | 337116                   | -    | -    | -    | -                           | -                       | -                                 | -                   | -             |

*General:*

Entries without information are marked by '-'.

**Table S5:** Open target v2g results mapping *trans*-variant rs10188292 to a putative causal gene

| Gene                | Overall V2G | Distance (Canonical TSS) | pQTL | sQTL | eQTL | Enhancer-TSS corr (FANTOM5) | PCHI-C (Javierre, 2016) | DHS-promoter corr (Thurman, 2012) | PCHI-C (Jung, 2019) | VEP (Ensembl) |
|---------------------|-------------|--------------------------|------|------|------|-----------------------------|-------------------------|-----------------------------------|---------------------|---------------|
| <i>IL37</i>         | 0.0465      | 171701                   | -    | -    | -    | -                           | -                       | -                                 | -                   | -             |
| <i>CBWD2</i>        | 0.0199      | 354825                   | -    | -    | -    | -                           | -                       | -                                 | -                   | -             |
| <i>PAX8</i>         | 0.0996      | 196055                   | -    | -    | -    | -                           | 0.9                     | -                                 | -                   | -             |
| <i>IL1F10</i>       | 0.0930      | 14896                    | -    | -    | 0.2  | -                           | -                       | -                                 | -                   | -             |
| <i>IGKV1OR2-108</i> | 0.0266      | 323530                   | -    | -    | -    | -                           | -                       | -                                 | -                   | -             |
| <i>IL36G</i>        | 0.0531      | 109663                   | -    | -    | -    | -                           | -                       | -                                 | -                   | -             |
| <i>FOXD4L1</i>      | 0.0133      | 415799                   | -    | -    | -    | -                           | -                       | -                                 | -                   | -             |
| <i>CHCHD5</i>       | 0.0000      | 498626                   | -    | -    | -    | -                           | -                       | -                                 | -                   | -             |
| <i>IL1B</i>         | 0.0332      | 246050                   | -    | -    | -    | -                           | -                       | -                                 | -                   | -             |
| <i>IL36A</i>        | 0.0531      | 77407                    | -    | -    | -    | -                           | -                       | -                                 | -                   | -             |
| <i>CKAP2L</i>       | 0.0266      | 318202                   | -    | -    | -    | -                           | -                       | -                                 | -                   | -             |
| <i>IL1A</i>         | 0.0266      | 298373                   | -    | -    | -    | -                           | -                       | -                                 | -                   | -             |
| <i>IL36RN</i>       | 0.0664      | 24228                    | -    | -    | -    | -                           | -                       | -                                 | 0                   | -             |
| <i>SLC20A1</i>      | 0.0465      | 436927                   | -    | -    | 0.3  | -                           | -                       | -                                 | -                   | -             |
| <i>PSD4</i>         | 0.2058      | 74459                    | -    | -    | 0.7  | -                           | 0.8                     | -                                 | 0                   | -             |
| <i>IL36B</i>        | 0.0598      | 29999                    | -    | -    | -    | -                           | -                       | -                                 | 0                   | -             |
| <i>IL1RN</i>        | 0.4058      | 16449                    | 0.9  | 0.4  | 0.6  | -                           | 0.9                     | -                                 | -                   | -             |
| <i>NT5DC4</i>       | 0.0199      | 361846                   | -    | -    | -    | -                           | -                       | -                                 | -                   | -             |

*General:*

Entries without information are marked by '-'.

**Table S6:** Open target v2g results mapping *trans*-variant rs4665972 to a putative causal gene

| Gene            | Overall V2G | Distance (Canonical TSS) | pQTL | sQTL | eQTL | Enhancer-TSS corr (FANTOM5) | PCHI-C (Javierre, 2016) | DHS-promoter corr (Thurman, 2012) | PCHI-C (Jung, 2019) | VEP (Ensembl)  |
|-----------------|-------------|--------------------------|------|------|------|-----------------------------|-------------------------|-----------------------------------|---------------------|----------------|
| <i>DNAHCSG</i>  | 0.0531      | 99797                    | -    | -    | -    | -                           | -                       | -                                 | -                   | -              |
| <i>PREB</i>     | 0.0332      | 240564                   | -    | -    | -    | -                           | -                       | -                                 | -                   | -              |
| <i>KHK</i>      | 0.0398      | 288483                   | -    | -    | -    | -                           | 0.2                     | -                                 | -                   | -              |
| <i>TRIM54</i>   | 0.1738      | 92801                    | -    | 0.6  | -    | -                           | -                       | -                                 | -                   | -              |
| <i>MAPRE3</i>   | 0.0133      | 404593                   | -    | -    | -    | -                           | -                       | -                                 | -                   | -              |
| <i>GTF3C2</i>   | 0.1328      | 18231                    | -    | -    | -    | -                           | 1                       | -                                 | -                   | -              |
| <i>KRTCAP3</i>  | 0.2799      | 67136                    | -    | 0.5  | 0.9  | -                           | -                       | -                                 | -                   | -              |
| <i>SNX17</i>    | 0.1994      | 4734                     | -    | -    | 0.8  | -                           | 0.1                     | -                                 | -                   | intron_variant |
| <i>ZNF512</i>   | 0.0398      | 207739                   | -    | -    | -    | -                           | -                       | -                                 | -                   | -              |
| <i>GPN1</i>     | 0.1531      | 253017                   | -    | 0.2  | 0.6  | -                           | 0                       | -                                 | -                   | -              |
| <i>EIF2B4</i>   | 0.1262      | 4892                     | -    | -    | 0.4  | -                           | 0.1                     | -                                 | -                   | -              |
| <i>PPM1G</i>    | 0.1527      | 34361                    | -    | -    | 0.7  | -                           | -                       | -                                 | -                   | -              |
| <i>IFT172</i>   | 0.2475      | 114575                   | -    | 0.9  | 0.1  | -                           | -                       | -                                 | -                   | -              |
| <i>ZNF513</i>   | 0.1062      | 5560                     | -    | -    | 0.3  | -                           | -                       | -                                 | -                   | -              |
| <i>NRBP1</i>    | 0.1793      | 52560                    | -    | -    | 0.9  | -                           | -                       | -                                 | -                   | -              |
| <i>TMEM214</i>  | 0.0664      | 342320                   | -    | -    | -    | -                           | 0.7                     | -                                 | -                   | -              |
| <i>SLC4A1AP</i> | 0.0465      | 288196                   | -    | -    | -    | -                           | 0.3                     | -                                 | -                   | -              |
| <i>CGREF1</i>   | 0.0332      | 256102                   | -    | -    | -    | -                           | -                       | -                                 | -                   | -              |
| <i>FNDC4</i>    | 0.2736      | 119970                   | -    | 0.7  | 0.6  | -                           | -                       | -                                 | -                   | -              |
| <i>ABHD1</i>    | 0.0332      | 251441                   | -    | -    | -    | -                           | -                       | -                                 | -                   | -              |
| <i>C2orf16</i>  | 0.0465      | 162156                   | -    | -    | -    | -                           | -                       | -                                 | -                   | -              |
| <i>SLC30A3</i>  | 0.0531      | 99413                    | -    | -    | -    | -                           | -                       | -                                 | -                   | -              |
| <i>MRPL33</i>   | 0.0133      | 396487                   | -    | -    | -    | -                           | -                       | -                                 | -                   | -              |
| <i>AGBL5</i>    | 0.0199      | 332866                   | -    | -    | -    | -                           | -                       | -                                 | -                   | -              |
| <i>SLC5A6</i>   | 0.1728      | 162272                   | -    | 0.1  | 0.8  | -                           | -                       | -                                 | -                   | -              |
| <i>TCF23</i>    | 0.0332      | 226226                   | -    | -    | -    | -                           | -                       | -                                 | -                   | -              |
| <i>OST4</i>     | 0.0266      | 303576                   | -    | -    | -    | -                           | 0                       | -                                 | -                   | -              |
| <i>ATRAID</i>   | 0.1527      | 163189                   | -    | -    | 0.8  | -                           | -                       | -                                 | -                   | -              |
| <i>UCN</i>      | 0.0598      | 66785                    | -    | -    | -    | -                           | -                       | -                                 | -                   | -              |
| <i>CCDC121</i>  | 0.0332      | 253782                   | -    | -    | -    | -                           | 0                       | -                                 | -                   | -              |
| <i>PRR30</i>    | 0.0332      | 235820                   | -    | -    | -    | -                           | -                       | -                                 | -                   | -              |
| <i>SUPT7L</i>   | 0.0465      | 288610                   | -    | -    | -    | -                           | 0.3                     | -                                 | -                   | -              |
| <i>EMILIN1</i>  | 0.0398      | 296615                   | -    | -    | -    | -                           | 0.2                     | -                                 | -                   | -              |
| <i>CAD</i>      | 0.0465      | 157861                   | -    | -    | -    | -                           | -                       | -                                 | -                   | -              |
| <i>MPV17</i>    | 0.0598      | 49550                    | -    | -    | -    | -                           | -                       | -                                 | -                   | -              |
| <i>GCKR</i>     | 0.2133      | 121609                   | -    | 0.4  | 0.6  | -                           | -                       | -                                 | -                   | -              |

General:

Entries without information are marked by '-'.

**Table S7:** Open target v2g results mapping *trans*-variant rs112875651 to a putative causal gene

| Gene          | Overall V2G | Distance (Canonical TSS) | pQTL | sQTL | eQTL | Enhancer-TSS corr (FANTOM5) | PCHI-C (Javierre, 2016) | DHS-promoter corr (Thurman, 2012) | PCHI-C (Jung, 2019) | VEP (Ensembl) |
|---------------|-------------|--------------------------|------|------|------|-----------------------------|-------------------------|-----------------------------------|---------------------|---------------|
| <i>SQLC</i>   | 0.0000      | 495955                   | -    | -    | -    | -                           | -                       | -                                 | -                   | -             |
| <i>TRIB1</i>  | 0.0598      | 64094                    | -    | -    | -    | -                           | -                       | -                                 | -                   | -             |
| <i>WASHC5</i> | 0.0398      | 402633                   | -    | -    | -    | -                           | 0.4                     | -                                 | -                   | -             |
| <i>NSMCE2</i> | 0.0398      | 402773                   | -    | -    | -    | -                           | 0.4                     | -                                 | -                   | -             |

*General:*

Entries without information are marked by '-'.

**Table S8:** Open target v2g results mapping *trans*-variant rs9591359 to a putative causal gene

| Gene            | Overall V2G | Distance (Canonical TSS) | pQTL | sQTL | eQTL | Enhancer-TSS corr (FANTOM5) | PCHI-C (Javierre, 2016) | DHS-promoter corr (Thurman, 2012) | PCHI-C (Jung, 2019) | VEP (Ensembl)  |
|-----------------|-------------|--------------------------|------|------|------|-----------------------------|-------------------------|-----------------------------------|---------------------|----------------|
| <i>DLEU7</i>    | 0.0799      | 68703                    | -    | -    | -    | -                           | -                       | -                                 | -                   | intron_variant |
| <i>C13orf42</i> | 0.0066      | 425016                   | -    | -    | -    | -                           | -                       | -                                 | -                   | -              |
| <i>RNASEH2B</i> | 0.0863      | 134511                   | -    | -    | 0.3  | -                           | -                       | -                                 | 0                   | -              |
| <i>FAM124A</i>  | 0.0066      | 447098                   | -    | -    | -    | -                           | -                       | -                                 | -                   | -              |

*General:*

Entries without information are marked by '-'.

**Table S9:** GWAS Catalog look-ups for putative causal genes for plasma SAP value.

| Trait               | APCS | C4BPB | IL1RN | KRTCAP3 | RNASEH2B | TRIB1 | ZNF644 | Counts |
|---------------------|------|-------|-------|---------|----------|-------|--------|--------|
| AAA                 | 0    | 0     | 0     | 0       | 0        | 1     | 0      | 1      |
| ALP                 | 0    | 0     | 1     | 0       | 0        | 1     | 1      | 3      |
| ALT                 | 0    | 0     | 0     | 0       | 0        | 1     | 0      | 1      |
| AST                 | 0    | 0     | 1     | 0       | 0        | 1     | 0      | 2      |
| Adiponectin         | 0    | 0     | 0     | 0       | 0        | 1     | 0      | 1      |
| Albuminuria         | 0    | 0     | 0     | 0       | 0        | 1     | 0      | 1      |
| Alcohol consumption | 0    | 0     | 0     | 0       | 0        | 1     | 0      | 1      |
| Apo-A1              | 0    | 0     | 0     | 0       | 0        | 1     | 0      | 1      |
| Apo-B               | 0    | 0     | 0     | 0       | 0        | 1     | 0      | 1      |
| BMI                 | 0    | 0     | 0     | 0       | 0        | 1     | 0      | 1      |
| BPH                 | 0    | 0     | 0     | 0       | 1        | 0     | 0      | 1      |
| Body height         | 0    | 0     | 0     | 0       | 0        | 1     | 0      | 1      |
| CRP                 | 0    | 0     | 1     | 0       | 0        | 1     | 1      | 3      |
| Cholesterol         | 0    | 0     | 0     | 0       | 0        | 1     | 1      | 2      |
| Ferritin            | 0    | 0     | 0     | 0       | 0        | 1     | 0      | 1      |
| Fibrinogen          | 0    | 0     | 1     | 0       | 0        | 0     | 0      | 1      |
| GGT                 | 0    | 0     | 0     | 0       | 0        | 1     | 0      | 1      |
| Glycine             | 0    | 0     | 0     | 0       | 0        | 1     | 0      | 1      |
| Granulocytes        | 0    | 0     | 1     | 0       | 0        | 0     | 0      | 1      |
| HDL-C               | 0    | 0     | 0     | 0       | 0        | 1     | 0      | 1      |
| Hb concentration    | 0    | 0     | 1     | 0       | 1        | 0     | 0      | 2      |
| HbA1c               | 0    | 0     | 0     | 0       | 0        | 1     | 0      | 1      |
| IBD                 | 0    | 0     | 0     | 0       | 0        | 1     | 0      | 1      |
| IL6 concentration   | 0    | 0     | 1     | 0       | 0        | 0     | 0      | 1      |
| Intelligence        | 0    | 0     | 0     | 0       | 0        | 0     | 1      | 1      |
| LDL-C               | 0    | 0     | 0     | 0       | 0        | 1     | 0      | 1      |
| Lymphocytes         | 0    | 0     | 1     | 0       | 0        | 0     | 0      | 1      |
| Metabolic syndrome  | 0    | 0     | 0     | 0       | 0        | 1     | 0      | 1      |
| Monocytes           | 0    | 0     | 1     | 0       | 0        | 0     | 0      | 1      |
| Neutrophils         | 0    | 0     | 1     | 0       | 0        | 0     | 0      | 1      |
| RDW                 | 0    | 0     | 1     | 0       | 0        | 0     | 0      | 1      |
| SBP                 | 0    | 0     | 0     | 0       | 1        | 1     | 0      | 2      |
| T2DM                | 0    | 0     | 0     | 0       | 0        | 1     | 0      | 1      |
| UTI                 | 0    | 0     | 0     | 0       | 1        | 0     | 0      | 1      |
| Urate               | 0    | 0     | 0     | 0       | 0        | 0     | 1      | 1      |
| Urine alb/creat     | 0    | 0     | 0     | 0       | 0        | 1     | 0      | 1      |
| WM microstructure   | 1    | 0     | 0     | 0       | 0        | 0     | 0      | 1      |
| eGFR                | 0    | 0     | 0     | 0       | 0        | 1     | 0      | 1      |

**Table S10:** The *cis*-Mendelian randomization results for the effects of one standard deviation higher plasma SAP value or plasma CRP concentration on dementia outcomes.

| GWAS pQTL               | Exposure (unit) | Outcome trait       | Point estimate (95%CI) | No variants | model    | Heterogeneity p-value | Heterogeneity chi-square statistic | p-value (scientific notation) | Unit | Multiplicity threshold |
|-------------------------|-----------------|---------------------|------------------------|-------------|----------|-----------------------|------------------------------------|-------------------------------|------|------------------------|
| Interval (n: 3,301)     | SAP (SD)        | Alzheimer's disease | 1.08 (1.03; 1.14)      | 11          | IVW      | 0.0443                | 18.698                             | $3.5 \times 10^{-3}$          | OR   | 0.0028                 |
| AGES (n: 5,368)         | SAP (SD)        | Alzheimer's disease | 1.19 (1.07; 1.33)      | 28          | MR Egger | 0.0143                | 44.212                             | $1.4 \times 10^{-3}$          | OR   | 0.0028                 |
| DECODE (n: 35,559)      | SAP (SD)        | Alzheimer's disease | 1.05 (1.00; 1.10)      | 58          | IVW      | 0.0009                | 96.355                             | $6.1 \times 10^{-2}$          | OR   | 0.0028                 |
| Combined SL (n: 44,288) | SAP (SD)        | Alzheimer's disease | 1.07 (1.02; 1.11)      | 53          | IVW      | 0.0002                | 96.500                             | $1.8 \times 10^{-3}$          | OR   | 0.0028                 |
| CRP (n: 575,531)        | CRP (SD)        | Alzheimer's disease | 1.04 (0.94; 1.16)      | 132         | MR Egger | 0.0013                | 183.930                            | $4.7 \times 10^{-1}$          | OR   | 0.0028                 |
| Interval (n: 3,301)     | SAP (SD)        | Lewy body dementia  | 1.57 (1.16; 2.12)      | 12          | MR Egger | 0.4782                | 9.579                              | $3.1 \times 10^{-3}$          | OR   | 0.0028                 |
| AGES (n: 5,368)         | SAP (SD)        | Lewy body dementia  | 1.27 (0.94; 1.72)      | 25          | MR Egger | 0.1004                | 31.986                             | $1.2 \times 10^{-1}$          | OR   | 0.0028                 |
| DECODE (n: 35,559)      | SAP (SD)        | Lewy body dementia  | 0.91 (0.73; 1.14)      | 52          | MR Egger | 0.3687                | 52.737                             | $4.2 \times 10^{-1}$          | OR   | 0.0028                 |
| Combined SL (n: 44,288) | SAP (SD)        | Lewy body dementia  | 1.37 (1.19; 1.59)      | 45          | IVW      | 0.3367                | 47.374                             | $1.5 \times 10^{-5}$          | OR   | 0.0028                 |
| CRP (n: 575,531)        | CRP (SD)        | Lewy body dementia  | 0.82 (0.63; 1.06)      | 127         | MR Egger | 0.0000                | 226.145                            | $1.2 \times 10^{-1}$          | OR   | 0.0028                 |

*General:*

Studies: Interval (ref: 24), DECODE (ref: 25), AGES (ref: 26), Combined SL, total subjects in the three GWAS with SomaLogic values for SAP.

**Table S11:** The *cis*-Mendelian randomization results for the effects of one standard deviation higher plasma SAP value on secondary outcomes

| GWAS pQTL               | Exposure (unit) | Outcome trait                 | Point estimate (95%CI) | No variants | model    | Heterogeneity p-value | Heterogeneity chi-square statistic | p-value (scientific notation) | Unit     | Multiplicity threshold |
|-------------------------|-----------------|-------------------------------|------------------------|-------------|----------|-----------------------|------------------------------------|-------------------------------|----------|------------------------|
| Interval (n: 3,301)     | SAP (SD)        | Osteoarthritis                | 1.07 (1.03; 1.12)      | 13          | MR Egger | 0.0049                | 26.819                             | $8.6 \times 10^{-4}$          | OR       | 0.0028                 |
| AGES (n: 5,368)         | SAP (SD)        | Osteoarthritis                | 1.01 (1.00; 1.03)      | 27          | IVW      | 0.1545                | 33.267                             | $1.3 \times 10^{-1}$          | OR       | 0.0028                 |
| DECODE (n: 35,559)      | SAP (SD)        | Osteoarthritis                | 1.09 (1.06; 1.12)      | 58          | MR Egger | 0.0000                | 115.978                            | $8.0 \times 10^{-9}$          | OR       | 0.0028                 |
| Combined SL (n: 44,288) | SAP (SD)        | Osteoarthritis                | 1.01 (1.00; 1.03)      | 49          | IVW      | 0.0127                | 72.505                             | $1.2 \times 10^{-1}$          | OR       | 0.0028                 |
| Interval (n: 3,301)     | SAP (SD)        | Osteoarthritis (hip)          | 1.13 (1.04; 1.24)      | 13          | MR Egger | 0.9109                | 5.389                              | $5.4 \times 10^{-3}$          | OR       | 0.0028                 |
| AGES (n: 5,368)         | SAP (SD)        | Osteoarthritis (hip)          | 1.11 (1.01; 1.23)      | 28          | MR Egger | 0.1388                | 33.851                             | $2.6 \times 10^{-2}$          | OR       | 0.0028                 |
| DECODE (n: 35,559)      | SAP (SD)        | Osteoarthritis (hip)          | 1.01 (0.97; 1.05)      | 59          | IVW      | 0.0014                | 95.624                             | $6.6 \times 10^{-1}$          | OR       | 0.0028                 |
| Combined SL (n: 44,288) | SAP (SD)        | Osteoarthritis (hip)          | 1.09 (1.02; 1.17)      | 55          | MR Egger | 0.1155                | 65.550                             | $1.2 \times 10^{-2}$          | OR       | 0.0028                 |
| Interval (n: 3,301)     | SAP (SD)        | Osteoarthritis (hip and knee) | 1.12 (1.04; 1.21)      | 12          | MR Egger | 0.0552                | 17.984                             | $3.6 \times 10^{-3}$          | OR       | 0.0028                 |
| AGES (n: 5,368)         | SAP (SD)        | Osteoarthritis (hip and knee) | 1.02 (1.00; 1.04)      | 27          | IVW      | 0.0000                | 73.906                             | $6.5 \times 10^{-2}$          | OR       | 0.0028                 |
| DECODE (n: 35,559)      | SAP (SD)        | Osteoarthritis (hip and knee) | 1.10 (1.05; 1.15)      | 53          | MR Egger | 0.0061                | 79.838                             | $8.5 \times 10^{-6}$          | OR       | 0.0028                 |
| Combined SL (n: 44,288) | SAP (SD)        | Osteoarthritis (hip and knee) | 1.00 (0.97; 1.02)      | 51          | IVW      | 0.0000                | 111.507                            | $9.2 \times 10^{-1}$          | OR       | 0.0028                 |
| Interval (n: 3,301)     | SAP (SD)        | Osteoarthritis (knee)         | 1.14 (1.04; 1.24)      | 12          | MR Egger | 0.0692                | 17.242                             | $6.3 \times 10^{-3}$          | OR       | 0.0028                 |
| AGES (n: 5,368)         | SAP (SD)        | Osteoarthritis (knee)         | 1.15 (1.08; 1.24)      | 26          | MR Egger | 0.0005                | 53.489                             | $6.1 \times 10^{-5}$          | OR       | 0.0028                 |
| DECODE (n: 35,559)      | SAP (SD)        | Osteoarthritis (knee)         | 1.09 (1.04; 1.15)      | 55          | MR Egger | 0.0077                | 81.160                             | $6.8 \times 10^{-4}$          | OR       | 0.0028                 |
| Combined SL (n: 44,288) | SAP (SD)        | Osteoarthritis (knee)         | 0.97 (0.94; 1.00)      | 49          | IVW      | 0.0000                | 103.149                            | $4.8 \times 10^{-2}$          | OR       | 0.0028                 |
| Interval (n: 3,301)     | SAP (SD)        | SLE                           | 0.94 (0.78; 1.13)      | 10          | IVW      | 0.0818                | 15.350                             | $4.8 \times 10^{-1}$          | OR       | 0.0028                 |
| AGES (n: 5,368)         | SAP (SD)        | SLE                           | 0.91 (0.83; 0.99)      | 26          | IVW      | 0.0257                | 40.531                             | $2.7 \times 10^{-2}$          | OR       | 0.0028                 |
| DECODE (n: 35,559)      | SAP (SD)        | SLE                           | 0.93 (0.83; 1.04)      | 49          | IVW      | 0.0051                | 76.845                             | $2.0 \times 10^{-1}$          | OR       | 0.0028                 |
| Combined SL (n: 44,288) | SAP (SD)        | SLE                           | 0.93 (0.85; 1.01)      | 45          | IVW      | 0.0015                | 77.066                             | $9.5 \times 10^{-2}$          | OR       | 0.0028                 |
| Interval (n: 3,301)     | SAP (SD)        | IPF                           | 1.00 (1.00; 1.00)      | 13          | IVW      | 0.0296                | 22.785                             | $2.1 \times 10^{-3}$          | OR       | 0.0028                 |
| AGES (n: 5,368)         | SAP (SD)        | IPF                           | 1.00 (1.00; 1.00)      | 28          | MR Egger | 0.5940                | 23.684                             | $2.1 \times 10^{-1}$          | OR       | 0.0028                 |
| DECODE (n: 35,559)      | SAP (SD)        | IPF                           | 1.00 (1.00; 1.00)      | 58          | MR Egger | 0.0959                | 70.213                             | $1.9 \times 10^{-1}$          | OR       | 0.0028                 |
| Combined SL (n: 44,288) | SAP (SD)        | IPF                           | 1.00 (1.00; 1.00)      | 52          | IVW      | 0.0035                | 82.371                             | $7.1 \times 10^{-1}$          | OR       | 0.0028                 |
| Interval (n: 3,301)     | SAP (SD)        | SBP                           | -0.03 (-0.16; 0.11)    | 10          | IVW      | 0.3014                | 10.637                             | $7.0 \times 10^{-1}$          | mmHg     | 0.0028                 |
| AGES (n: 5,368)         | SAP (SD)        | SBP                           | -0.08 (-0.33; 0.18)    | 27          | MR Egger | 0.1258                | 33.212                             | $5.5 \times 10^{-1}$          | mmHg     | 0.0028                 |
| DECODE (n: 35,559)      | SAP (SD)        | SBP                           | -0.21 (-0.47; 0.06)    | 41          | MR Egger | 0.1069                | 50.255                             | $1.3 \times 10^{-1}$          | mmHg     | 0.0028                 |
| Combined SL (n: 44,288) | SAP (SD)        | SBP                           | -0.16 (-0.26; -0.07)   | 46          | IVW      | 0.0005                | 82.593                             | $1.1 \times 10^{-3}$          | mmHg     | 0.0028                 |
| Interval (n: 3,301)     | SAP (SD)        | DBP                           | -0.55 (-1.13; 0.04)    | 10          | MR Egger | 0.0763                | 14.214                             | $6.7 \times 10^{-2}$          | mmHg     | 0.0028                 |
| AGES (n: 5,368)         | SAP (SD)        | DBP                           | -0.04 (-0.10; 0.01)    | 28          | IVW      | 0.0044                | 50.121                             | $1.2 \times 10^{-1}$          | mmHg     | 0.0028                 |
| DECODE (n: 35,559)      | SAP (SD)        | DBP                           | 0.03 (-0.04; 0.11)     | 46          | IVW      | 0.0001                | 88.512                             | $3.9 \times 10^{-1}$          | mmHg     | 0.0028                 |
| Combined SL (n: 44,288) | SAP (SD)        | DBP                           | -0.09 (-0.15; -0.03)   | 44          | IVW      | 0.0002                | 84.341                             | $2.2 \times 10^{-3}$          | mmHg     | 0.0028                 |
| Interval (n: 3,301)     | SAP (SD)        | CHD                           | 1.03 (1.01; 1.05)      | 13          | IVW      | 0.7922                | 7.909                              | $3.5 \times 10^{-4}$          | OR       | 0.0028                 |
| AGES (n: 5,368)         | SAP (SD)        | CHD                           | 1.01 (0.97; 1.05)      | 26          | MR Egger | 0.0000                | 62.829                             | $7.6 \times 10^{-1}$          | OR       | 0.0028                 |
| DECODE (n: 35,559)      | SAP (SD)        | CHD                           | 0.99 (0.97; 1.01)      | 54          | IVW      | 0.0011                | 90.282                             | $3.1 \times 10^{-1}$          | OR       | 0.0028                 |
| Combined SL (n: 44,288) | SAP (SD)        | CHD                           | 1.03 (1.01; 1.05)      | 50          | IVW      | 0.0044                | 78.772                             | $7.3 \times 10^{-4}$          | OR       | 0.0028                 |
| Interval (n: 3,301)     | SAP (SD)        | T2DM                          | 1.02 (1.00; 1.05)      | 10          | IVW      | 0.0131                | 20.896                             | $8.8 \times 10^{-2}$          | OR       | 0.0028                 |
| AGES (n: 5,368)         | SAP (SD)        | T2DM                          | 1.02 (1.00; 1.04)      | 26          | IVW      | 0.0126                | 43.401                             | $3.6 \times 10^{-2}$          | OR       | 0.0028                 |
| DECODE (n: 35,559)      | SAP (SD)        | T2DM                          | 0.96 (0.92; 1.00)      | 50          | MR Egger | 0.0208                | 69.981                             | $5.1 \times 10^{-2}$          | OR       | 0.0028                 |
| Combined SL (n: 44,288) | SAP (SD)        | T2DM                          | 1.01 (0.98; 1.03)      | 49          | IVW      | 0.0306                | 67.935                             | $6.0 \times 10^{-1}$          | OR       | 0.0028                 |
| Interval (n: 3,301)     | SAP (SD)        | ALT                           | 0.00 (-0.00; 0.01)     | 13          | MR Egger | 0.2146                | 14.343                             | $9.9 \times 10^{-2}$          | log(U/L) | 0.0028                 |
| AGES (n: 5,368)         | SAP (SD)        | ALT                           | 0.00 (-0.00; 0.00)     | 29          | IVW      | 0.2893                | 31.643                             | $6.7 \times 10^{-1}$          | log(U/L) | 0.0028                 |
| DECODE (n: 35,559)      | SAP (SD)        | ALT                           | -0.00 (-0.00; 0.00)    | 57          | MR Egger | 0.8466                | 44.375                             | $7.7 \times 10^{-1}$          | log(U/L) | 0.0028                 |
| Combined SL (n: 44,288) | SAP (SD)        | ALT                           | 0.00 (-0.00; 0.00)     | 52          | IVW      | 0.1701                | 60.510                             | $1.9 \times 10^{-1}$          | log(U/L) | 0.0028                 |
| Interval (n: 3,301)     | SAP (SD)        | AST                           | -0.00 (-0.02; 0.01)    | 7           | IVW      | 0.8304                | 2.825                              | $5.5 \times 10^{-1}$          | SD       | 0.0028                 |
| AGES (n: 5,368)         | SAP (SD)        | AST                           | -0.00 (-0.01; 0.01)    | 16          | IVW      | 0.3593                | 16.348                             | $9.8 \times 10^{-1}$          | SD       | 0.0028                 |
| DECODE (n: 35,559)      | SAP (SD)        | AST                           | -0.02 (-0.04; 0.00)    | 30          | MR Egger | 0.0023                | 53.883                             | $7.7 \times 10^{-2}$          | SD       | 0.0028                 |
| Combined SL (n: 44,288) | SAP (SD)        | AST                           | -0.00 (-0.01; 0.00)    | 30          | IVW      | 0.0020                | 55.860                             | $1.4 \times 10^{-1}$          | SD       | 0.0028                 |

|                         |          |                       |                      |    |          |        |         |                      |          |        |
|-------------------------|----------|-----------------------|----------------------|----|----------|--------|---------|----------------------|----------|--------|
| Interval (n: 3,301)     | SAP (SD) | GGT                   | 0.00 (-0.00; 0.00)   | 13 | IVW      | 0.0060 | 27.737  | $6.0 \times 10^{-2}$ | log(U/L) | 0.0028 |
| AGES (n: 5,368)         | SAP (SD) | GGT                   | -0.00 (-0.00; 0.00)  | 28 | IVW      | 0.0129 | 45.937  | $8.8 \times 10^{-1}$ | log(U/L) | 0.0028 |
| DECODE (n: 35,559)      | SAP (SD) | GGT                   | 0.00 (0.00; 0.00)    | 58 | IVW      | 0.0001 | 107.573 | $1.5 \times 10^{-2}$ | log(U/L) | 0.0028 |
| Combined SL (n: 44,288) | SAP (SD) | GGT                   | 0.00 (0.00; 0.01)    | 52 | MR Egger | 0.0002 | 93.710  | $5.0 \times 10^{-2}$ | log(U/L) | 0.0028 |
| Interval (n: 3,301)     | SAP (SD) | Total brain volume    | 0.01 (-0.02; 0.04)   | 11 | IVW      | 0.7042 | 7.223   | $6.3 \times 10^{-1}$ | SD       | 0.0028 |
| AGES (n: 5,368)         | SAP (SD) | Total brain volume    | 0.01 (-0.01; 0.03)   | 30 | IVW      | 0.5319 | 27.739  | $1.7 \times 10^{-1}$ | SD       | 0.0028 |
| DECODE (n: 35,559)      | SAP (SD) | Total brain volume    | -0.01 (-0.04; 0.02)  | 50 | IVW      | 0.8835 | 37.548  | $5.7 \times 10^{-1}$ | SD       | 0.0028 |
| Combined SL (n: 44,288) | SAP (SD) | Total brain volume    | 0.06 (0.02; 0.10)    | 50 | MR Egger | 0.3700 | 50.634  | $2.0 \times 10^{-3}$ | SD       | 0.0028 |
| Interval (n: 3,301)     | SAP (SD) | Cerebral WMH volume   | -0.08 (-0.14; -0.03) | 10 | IVW      | 0.3732 | 9.725   | $2.2 \times 10^{-3}$ | white    | 0.0028 |
| AGES (n: 5,368)         | SAP (SD) | Cerebral WMH volume   | -0.12 (-0.20; -0.04) | 29 | MR Egger | 0.6213 | 24.162  | $4.3 \times 10^{-3}$ | white    | 0.0028 |
| DECODE (n: 35,559)      | SAP (SD) | Cerebral WMH volume   | -0.06 (-0.10; -0.02) | 55 | IVW      | 0.0238 | 76.467  | $3.9 \times 10^{-3}$ | white    | 0.0028 |
| Combined SL (n: 44,288) | SAP (SD) | Cerebral WMH volume   | -0.03 (-0.07; 0.01)  | 52 | IVW      | 0.0411 | 69.816  | $1.4 \times 10^{-1}$ | white    | 0.0028 |
| Interval (n: 3,301)     | SAP (SD) | Circulating total tau | 0.03 (-0.00; 0.06)   | 11 | IVW      | 0.0299 | 19.935  | $6.6 \times 10^{-2}$ | log2     | 0.0028 |
| AGES (n: 5,368)         | SAP (SD) | Circulating total tau | -0.02 (-0.04; 0.01)  | 27 | IVW      | 0.1325 | 34.101  | $1.7 \times 10^{-1}$ | log2     | 0.0028 |
| DECODE (n: 35,559)      | SAP (SD) | Circulating total tau | 0.05 (0.02; 0.08)    | 53 | IVW      | 0.0141 | 76.877  | $3.6 \times 10^{-3}$ | log2     | 0.0028 |
| Combined SL (n: 44,288) | SAP (SD) | Circulating total tau | -0.09 (-0.16; -0.02) | 49 | MR Egger | 0.0126 | 71.314  | $1.8 \times 10^{-2}$ | log2     | 0.0028 |

*General:*

Studies: Interval (ref: 24), DECODE (ref: 25), AGES (ref: 26), Combined SL, total subjects in the three GWAS with SomaLogic values for SAP. Outcome trait abbreviations: SLE, systemic lupus erythematosus; IPF, idiopathic pulmonary fibrosis, SBP, systolic blood pressure; DBP, diastolic blood pressure; CHD, coronary heart disease; T2DM, type 2 diabetes mellitus; ALT, AST, GGT, plasma concentrations of, respectively, alanine transaminase, aspartate transaminase,  $\gamma$ -glutamyl transferase; cerebral WMH, white matter hyperintensity, volume.

**Table S12:** The *cis*-Mendelian randomization results for the effects of one standard deviation higher plasma CRP concentration on secondary outcomes

| GWAS pQTL        | Exposure (unit) | Outcome trait                 | Point estimate (95%CI) | No variants | model    | Heterogeneity p-value | Heterogeneity chi-square statistic | p-value (scientific notation) | Unit     | Multiplicity threshold |
|------------------|-----------------|-------------------------------|------------------------|-------------|----------|-----------------------|------------------------------------|-------------------------------|----------|------------------------|
| CRP (n: 575,531) | CRP (SD)        | Osteoarthritis                | 1.04 (1.00; 1.08)      | 153         | MR Egger | 0.0000                | 251.92                             | $2.9 \times 10^{-2}$          | OR       | 0.0028                 |
| CRP (n: 575,531) | CRP (SD)        | Osteoarthritis (hip)          | 1.15 (1.08; 1.23)      | 172         | MR Egger | 0.0000                | 258.36                             | $2.3 \times 10^{-5}$          | OR       | 0.0028                 |
| CRP (n: 575,531) | CRP (SD)        | Osteoarthritis (hip and knee) | 1.02 (0.98; 1.07)      | 158         | MR Egger | 0.0000                | 321.26                             | $3.4 \times 10^{-1}$          | OR       | 0.0028                 |
| CRP (n: 575,531) | CRP (SD)        | Osteoarthritis (knee)         | 0.99 (0.94; 1.05)      | 165         | MR Egger | 0.0000                | 316.49                             | $8.0 \times 10^{-1}$          | OR       | 0.0028                 |
| CRP (n: 575,531) | CRP (SD)        | SLE                           | 0.77 (0.62; 0.95)      | 110         | MR Egger | 0.0000                | 204.75                             | $1.4 \times 10^{-2}$          | OR       | 0.0028                 |
| CRP (n: 575,531) | CRP (SD)        | IPF                           | 1.00 (1.00; 1.00)      | 166         | MR Egger | 0.0000                | 323.75                             | $8.4 \times 10^{-2}$          | OR       | 0.0028                 |
| CRP (n: 575,531) | CRP (SD)        | SBP                           | -0.05 (-0.20; 0.11)    | 102         | IVW      | 0.0000                | 180.05                             | $5.5 \times 10^{-1}$          | mmHg     | 0.0028                 |
| CRP (n: 575,531) | CRP (SD)        | DBP                           | 0.05 (-0.05; 0.15)     | 105         | IVW      | 0.0000                | 182.27                             | $2.9 \times 10^{-1}$          | mmHg     | 0.0028                 |
| CRP (n: 575,531) | CRP (SD)        | CHD                           | 1.02 (0.99; 1.05)      | 151         | MR Egger | 0.0000                | 241.24                             | $2.2 \times 10^{-1}$          | OR       | 0.0028                 |
| CRP (n: 575,531) | CRP (SD)        | T2DM                          | 1.03 (0.99; 1.07)      | 140         | MR Egger | 0.0000                | 235.82                             | $1.5 \times 10^{-1}$          | OR       | 0.0028                 |
| CRP (n: 575,531) | CRP (SD)        | ALT                           | 0.01 (0.00; 0.01)      | 165         | IVW      | 0.0000                | 340.31                             | $4.1 \times 10^{-8}$          | log(U/L) | 0.0028                 |
| CRP (n: 575,531) | CRP (SD)        | AST                           | 0.02 (0.01; 0.03)      | 50          | IVW      | 0.0010                | 85.16                              | $3.3 \times 10^{-4}$          | SD       | 0.0028                 |
| CRP (n: 575,531) | CRP (SD)        | GGT                           | -0.00 (-0.00; 0.00)    | 156         | IVW      | 0.0000                | 284.49                             | $8.5 \times 10^{-1}$          | log(U/L) | 0.0028                 |
| CRP (n: 575,531) | CRP (SD)        | Total brain volume            | 0.04 (0.00; 0.08)      | 122         | MR Egger | 0.0001                | 187.06                             | $4.7 \times 10^{-2}$          | SD       | 0.0028                 |
| CRP (n: 575,531) | CRP (SD)        | Cerebral WMH volume           | 0.01 (-0.07; 0.09)     | 137         | MR Egger | 0.0000                | 214.52                             | $8.5 \times 10^{-1}$          | white    | 0.0028                 |
| CRP (n: 575,531) | CRP (SD)        | Circulating total tau         | 0.20 (0.17; 0.24)      | 143         | IVW      | 0.0002                | 209.08                             | $1.0 \times 10^{-100}$        | log2     | 0.0028                 |

*General:*

Outcome trait abbreviations: SLE, systemic lupus erythematosus; IPF, idiopathic pulmonary fibrosis; SBP, systolic blood pressure; DBP, diastolic blood pressure; CHD, coronary heart disease; T2DM, type 2 diabetes mellitus; ALT, AST, GGT, plasma concentrations of, respectively, alanine transaminase, aspartate transaminase,  $\gamma$ -glutamyl transferase; cerebral WMH, white matter hyperintensity, volume.

**Table S13:** The *cis*-multivariable Mendelian randomization results for the effects of one standard deviation higher plasma SAP value or plasma CRP concentration.

| Exposure   co-variate | Exposure (unit) | Outcome trait         | Point estimate (95%CI) | No variants | model    | Heterogeneity p-value | Heterogeneity chi-square statistic | p-value (scientific notation) | Unit | Multiplicity threshold |
|-----------------------|-----------------|-----------------------|------------------------|-------------|----------|-----------------------|------------------------------------|-------------------------------|------|------------------------|
| SAP   CRP             | SAP (SD)        | Osteoarthritis (hip)  | 1.11 (1.04; 1.19)      | 30          | MR Egger | 0.6400                | 23.83                              | $2.98 \times 10^{-3}$         | OR   | 0.0028                 |
| CRP   SAP             | CRP log(mg/L)   | Osteoarthritis (hip)  | 1.02 (0.93; 1.11)      | 30          | IVW      | 0.2612                | 32.33                              | $6.46 \times 10^{-1}$         | OR   | 0.0028                 |
| SAP   CRP             | SAP (SD)        | Total brain volume    | -0.00 (-0.02; 0.01)    | 30          | IVW      | 0.8214                | 21.09                              | $6.38 \times 10^{-1}$         | SD   | 0.0028                 |
| CRP   SAP             | CRP log(mg/L)   | Total brain volume    | 0.04 (-0.01; 0.09)     | 30          | IVW      | 0.8214                | 21.09                              | $1.11 \times 10^{-1}$         | SD   | 0.0028                 |
| SAP   CRP             | SAP (SD)        | Circulating total tau | 0.06 (0.03; 0.08)      | 29          | IVW      | 0.6120                | 24.33                              | $4.55 \times 10^{-6}$         | log2 | 0.0028                 |
| CRP   SAP             | CRP log(mg/L)   | Circulating total tau | 0.20 (0.14; 0.25)      | 29          | IVW      | 0.6120                | 24.33                              | $2.62 \times 10^{-12}$        | log2 | 0.0028                 |
